# Supplementary material
Source: PubMed Central journal article supplement (PMC2902890)
Supplement: gfp739_1.pdf [file gfp739_1.pdf]

**Online Supplemental Table. Strength Training Exercise Intensity**

|                                                                                 | <b>Minimum</b> | <b>Maximum</b> | <b>Mean</b> | <b>SD</b> |
|---------------------------------------------------------------------------------|----------------|----------------|-------------|-----------|
| Right knee extension with dorsi/plantar flexion                                 |                |                |             |           |
| Weight (lbs)                                                                    | 1.6            | 11.6           | 5.0         | 2.2       |
| RPE                                                                             | 1.2            | 5.7            | 3.4         | 1.2       |
| Left knee extension with dorsi/plantar flexion                                  |                |                |             |           |
| Weight (lbs)                                                                    | 1.4            | 8.1            | 4.5         | 1.9       |
| RPE                                                                             | 1.2            | 5.9            | 3.5         | 1.3       |
| Seated leg curl with both legs keeping the heels pressed firmly against a chair |                |                |             |           |
| Weight (lbs)                                                                    | 4.1            | 66.8           | 31.6        | 19.4      |
| RPE                                                                             | 1.5            | 5.4            | 3.2         | 1.2       |
| Semi-recumbent right inner leg raises                                           |                |                |             |           |
| Weight (lbs)                                                                    | 1.2            | 6.1            | 2.7         | 1.4       |
| RPE                                                                             | 1.2            | 5.6            | 3.6         | 1.3       |
| Semi-recumbent left inner leg raises                                            |                |                |             |           |
| Weight (lbs)                                                                    | 1.2            | 6.1            | 2.6         | 1.4       |
| RPE                                                                             | 1.2            | 5.9            | 3.6         | 1.3       |
| Semi-recumbent dorsi/plantar flexion with straight legs                         |                |                |             |           |
| Weight (lbs)                                                                    | 1.7            | 8.1            | 3.7         | 1.7       |
| RPE                                                                             | 1.0            | 5.1            | 3.2         | 1.2       |

RPE: self-reported rate of perceived exertion, lbs: pounds
